# Supplementary material for: Karyotype diversity of pseudoscorpions of the genus Chthonius (Pseudoscorpiones, Chthoniidae) in the Alps
Source: Comp Cytogenet. 2016 Aug 31;10(3):325–45. doi: 10.3897/CompCytogen.v10i3.8906 (PMC5088348; doi:10.3897/CompCytogen.v10i3.8906)
Supplement: Supplementary material 1 — Table S1 [file CompCytogen-010-325-s001.xls]

## Sheet: List1
Relative ĺength of the haploid set
(ppach - postpachytene, met I - metaphase I, met II - metaphase II, mit - mitotic metaphase)
chrom. 1	ppach	met I	met II	mit		chrom. 8	ppach	met I	met II	mit
ppach		-3.03052	1.9746	2.69165		ppach		-0.66096	1.82747	5.4291
met I	0.00382843		6.09707	7.89563		met I	0.511448		3.60737	9.04097
met II	0.0556131	7.25321e-08		0.331697		met II	0.0752887	0.000590627		2.16965
mit	0.00944598	1.39199e-11	0.741169			mit	1.44118e-06	6.59276e-14	0.0336392
chrom. 2	ppach	met I	met II	mit		chrom. 9	ppach	met I	met II	mit
ppach		0.431415	3.61601	6.05703		ppach		-2.52307	0.922561	4.01323
met I	0.667917		4.9061	7.66996		met I	0.0147936		3.76052	9.64925
met II	0.000811466	6.0906e-06		0.550618		met II	0.361768	0.000365887		2.4134
mit	1.3814e-07	3.34551e-11	0.583674			mit	0.000185923	5.28259e-15	0.0185041
chrom. 3	ppach	met I	met II	mit		chrom. 10	ppach	met I	met II	mit
ppach		-3.15503	2.42101	3.70742		ppach		-0.896728	2.9118	5.514
met I	0.00266749		7.57358	10.6187		met I	0.37392		4.81638	8.29511
met II	0.0203622	1.53473e-10		0.611331		met II	0.00598416	9.11077e-06		1.7321
mit	0.000501901	5.24682e-17	0.543049			mit	1.01251e-06	1.96663e-12	0.0879265
chrom. 4	ppach	met I	met II	mit		chrom. 11	ppach	met I	met II	mit
ppach		-1.70257	5.69348	4.26346		ppach		-0.738055	3.30216	4.30277
met I	0.0943992		9.0473	8.07507		met I	0.463864		5.42035	7.13604
met II	1.78521e-06	4.67731e-13		-2.26354		met II	0.00205996	9.64996e-07		0.827684
mit	8.70241e-05	6.22539e-12	0.0271713			mit	7.13112e-05	4.10046e-10	0.410788
chrom. 5	ppach	met I	met II	mit		chrom. 12	ppach	met I	met II	mit
ppach		-2.01767	-0.459468	6.59518		ppach		0.769556	2.43102	4.43965
met I	0.0487015		1.56675	9.04397		met I	0.445045		1.98337	4.40223
met II	0.648587	0.121956		5.44871		met II	0.0195154	0.0514263		1.98331
mit	2.58046e-08	7.98297e-14	8.96364e-07			mit	4.49052e-05	3.28128e-05	0.0513143
chrom. 6	ppach	met I	met II	mit		chrom. 13	ppach	met I	met II	mit
ppach		1.67154	1.47462	9.90404		ppach		1.05869	3.03668	3.51525
met I	0.100742		0.667217	8.82726		met I	0.294729		2.81426	3.51385
met II	0.148341	0.50696		4.78967		met II	0.00430618	0.00651523		0.260615
mit	1.17747e-13	1.91954e-13	9.41567e-06			mit	0.000908726	0.000738483	0.795213
chrom. 7	ppach	met I	met II	mit		chrom. 14	ppach	met I	met II	mit
ppach		2.12621	2.16362	10.5743		ppach		-0.0104249	1.49387	2.00457
met I	0.038074		1.21391	7.77966		met I	0.991722		1.97949	2.71303
met II	0.0365234	0.228983		3.56417		met II	0.143467	0.0520659		0.264007
mit	2.37456e-14	2.51126e-11	0.000696274			mit	0.0501302	0.00818068	0.79261
						chrom. X	ppach	met I	met II	mit
						ppach		3.72353	-7.64851	-11.9775
						met I	0.000491633		-17.8285	-25.4375
						met II	2.38241e-09	3.92189e-27		-5.86279
						mit	1.93686e-16	0	1.53402e-07
Arm ratio of chromosome 2 and X sex chromosome
(1 - postpachytene, 2 - metaphase I, 3 - metaphase II, 4 - mitotic metaphase)
chrom. 2	ppach	met I	met II	mit		chrom. X	ppach	met I	met II	mit
ppach		-0.235308	1.57558	1.1981		ppach		-1.90714	-2.06637	-0.588748
met I	0.81486		2.36429	2.01038		met I	0.0618274		-0.357004	1.85515
met II	0.122808	0.0208841		-0.351469		met II	0.0451492	0.722178		2.02063
mit	0.23631	0.0477603	0.72634			mit	0.558398	0.0670822	0.0470907
